# Supplementary material
Source: HighWire-hosted journal article supplement (https://bmjopen.bmj.com/content/12/9/e066051)
Supplement: inline-supplementary-material-2 [file inline-supplementary-material-2.pdf]

## Supplementary data

### Who are the patients being offered the faecal immunochemical test in routine English general practice, and for what symptoms? A prospective descriptive study

#### Supplemental file 2. FIT requests and GP-recorded symptoms in the East of England between November 2018 and May 2020

*Anonymised data on FIT requests, FIT results and GP-recorded symptom/s with FIT request covering the period from FIT implementation in November 2018 to May 2020.*

From November 2018 to May 2020, 15,620 valid FITs were performed in this region. The number of FITs ordered increased from November 2018 to May 2020, reaching a peak in January 2020 (1512 valid tests), reducing during the early pandemic (compared with January, March, 26.3% and April, 50.1% decreases respectively), and increasing again in May 2020 (1465 valid tests) (Figure 1). Of the 15,620 valid FITs performed during this period, 20.7% (n=3237) were positive (range 15.1% (November 2018, Norfolk only) to 29.1% (both areas, April 2020)).

**Figure 1. All FIT requests and FIT positives in Eastern England post DG30 implementation**

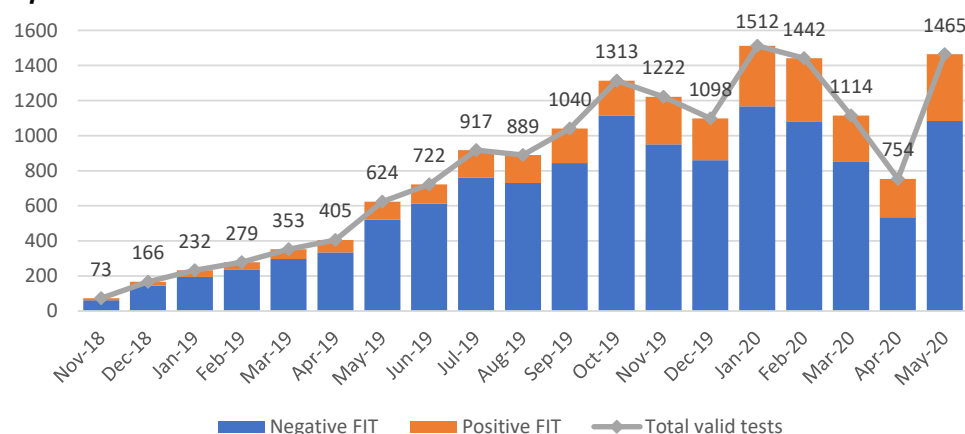

The proportion of GP-recorded symptoms was lower when compared to patient-reported symptoms, and similar to GP-recorded symptoms in the study. This was the case for all reported symptoms (Figure 2).

Figure 2. Historical and FIT-East data for symptom reporting

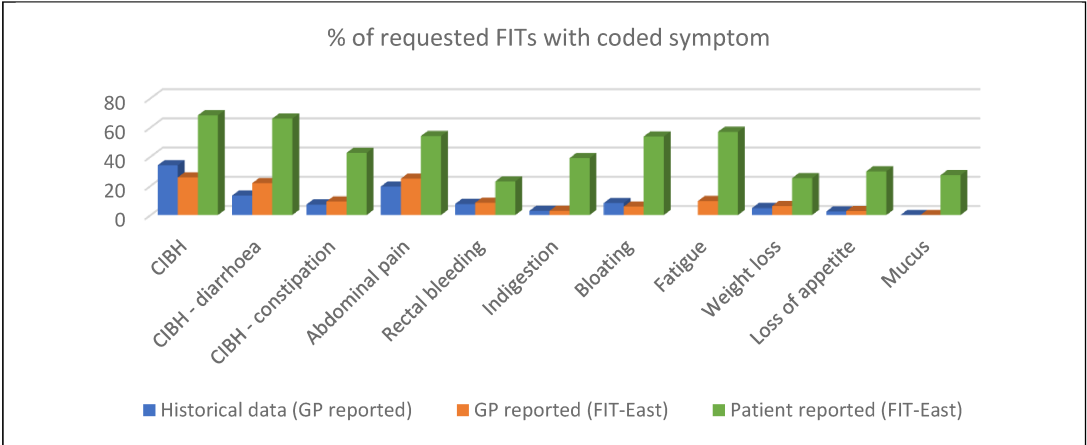

Historical, aggregated data has no information on fatigue, and mucus was only available as an answer option in the patient questionnaire.
